# Supplementary material
Source: Springer Nature journal article supplement (https://www.springermedizin.de/resource/supplementary/13550_2011_24_MOESM1_ESM.pdf/9687426)

**A**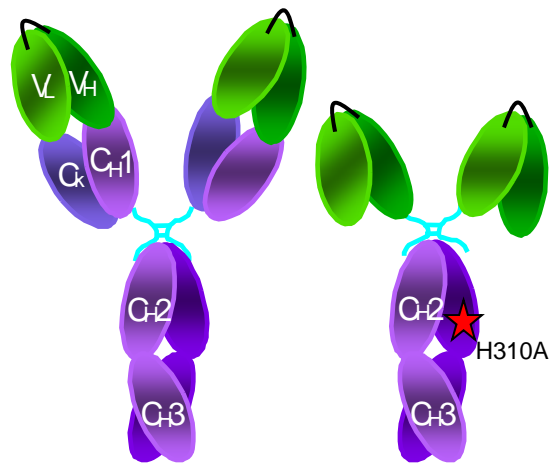

|                               | Intact chimeric Ab | ScFv-Fc Ab |
|-------------------------------|--------------------|------------|
| Molecular Weight              | 150 kDa            | 105 kDa    |
| Serum Half-Life ( $t_{1/2}$ ) | 10-20 days         | 10 days    |
|                               |                    | ★ 27 hours |

**B**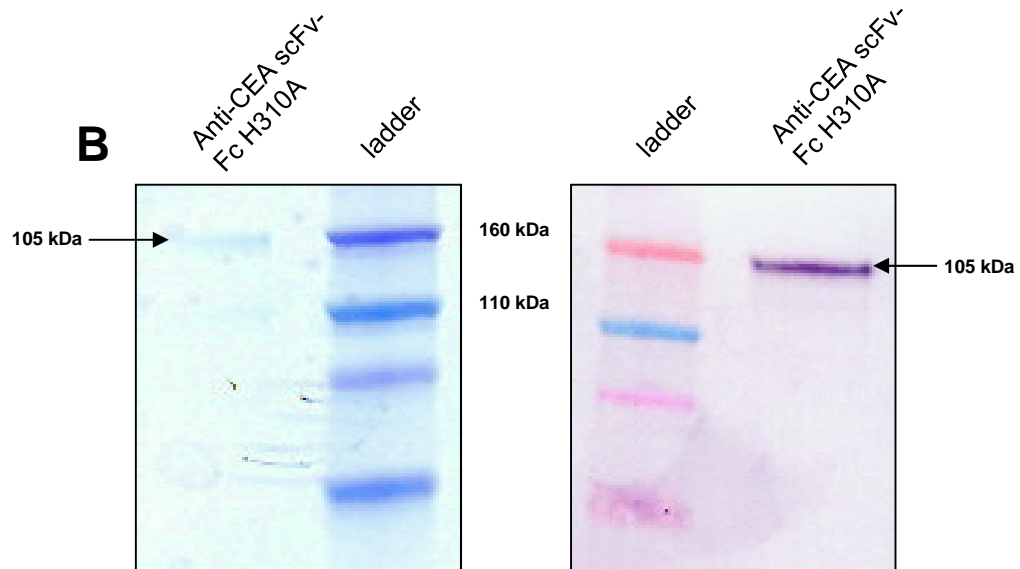**C**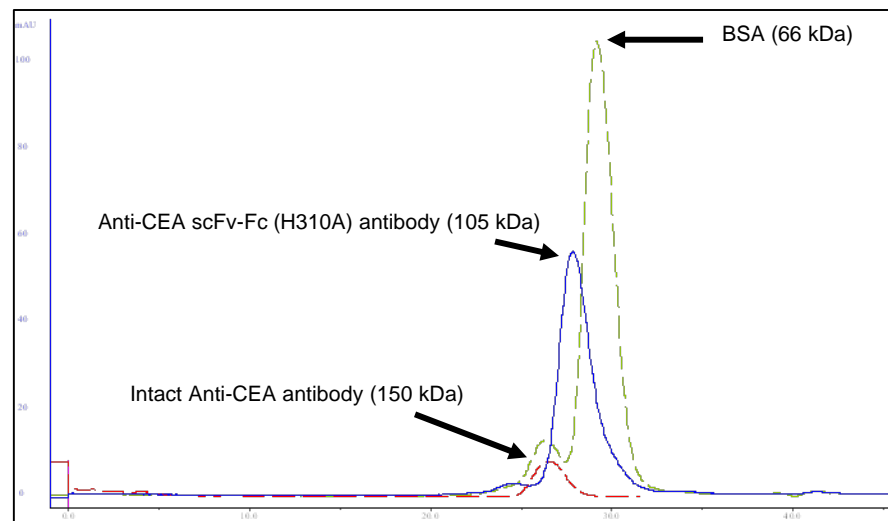

Supplement: MOESM1 [file 9687426]
